# Supplementary material for: Changes in the Mean Intrahepatic Target Computed Tomography Attenuation Value During Treatment May Be a Useful New Predictor of the Post-progression Survival Associated with Lenvatinib Treatment
Source: PubMed Central journal article supplement — Intern Med. 2021 Sep 11;61(7):951–8. doi: 10.2169/internalmedicine.7589-21 (PMC9038468; doi:10.2169/internalmedicine.7589-21), 2021-09-11
Supplement: 1349-7235-61-0951-s001.pdf [file 1349-7235-61-0951-s001.pdf]

## Dynamic study, arterial phase

---

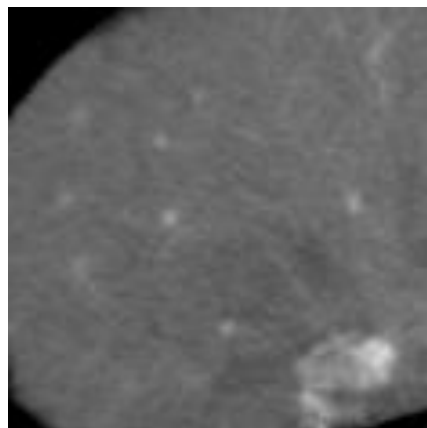

*Type-1*

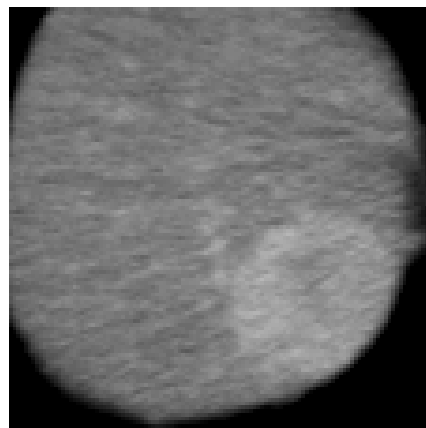

*Type-2*

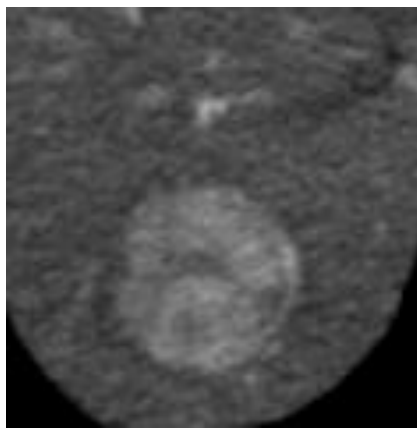

*Type-3*

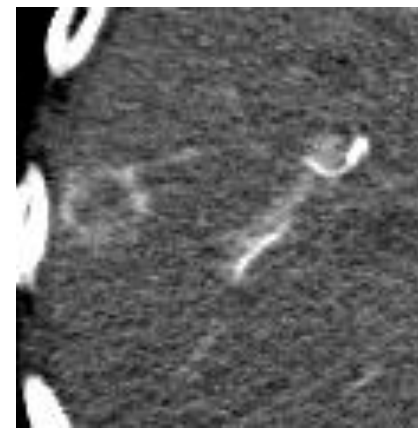

*Type-4*

## Dynamic study, portal phase

---

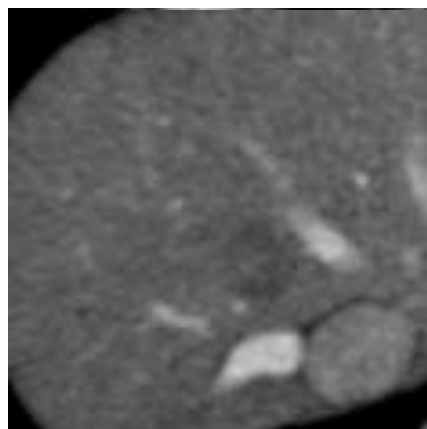

*Type-1*

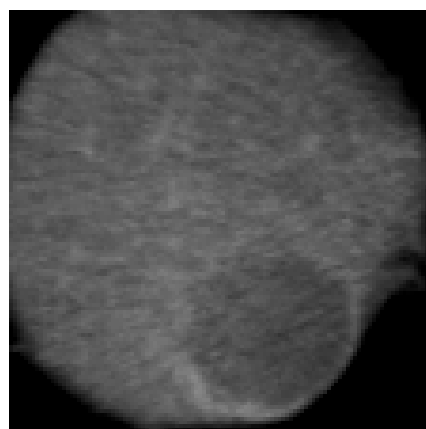

*Type-2*

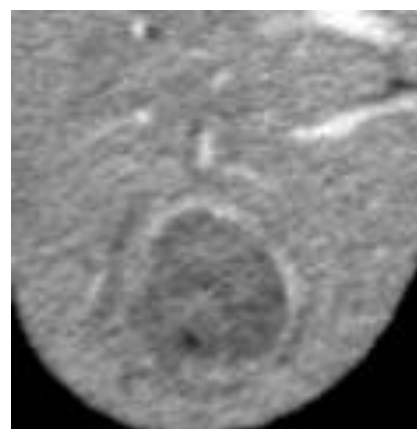

*Type-3*

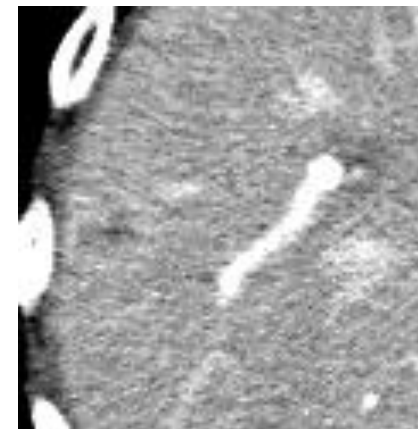

*Type-4*
